# Supplementary material
Source: MDPI journal article supplement (https://www.mdpi.com/1996-1073/15/5/1939)
Supplement: s1 [file s1]

## Supplementary Material

# Effective Inhibition of Carbon Steel Corrosion by Waterborne Polyurethane Based on N-*tert*-Butyl Diethanolamine in 2M HCl: Experimental and Computational Findings

Yulia F. Zaripova <sup>1</sup>, Sherzod Razhabov <sup>2</sup>, Roman S. Pavelyev <sup>1</sup>, Svetlana S. Vinogradova <sup>2,\*</sup>,  
Renat R. Nazmutdinov <sup>2</sup>, Iskander R. Vakhitov <sup>3</sup> and Mikhail A. Varfolomeev <sup>1,\*</sup>

<sup>1</sup> Department of Petroleum Engineering, Kazan Federal University, Kremlevskaya Str. 18, 420008 Kazan, Russia; yu-ya98@yandex.ru (Y.F.Z.); rpavelyev@gmail.com (R.S.P.)

<sup>2</sup> Department of Electrochemical Engineering, Kazan National Research Technological University, Karl Marx Str. 68, 420015 Kazan, Russia; sherzodrazhabov@mail.ru (S.R.); nazmutdi@mail.ru (R.R.N.)

<sup>3</sup> Department of Physics, Kazan Federal University, Kremlevskaya Str. 18, 420008 Kazan, Russia; iskvakhitov@gmail.com

\* Correspondence: vsvet@kstu.ru (S.S.V.); vma.ksu@gmail.com (M.A.V.)

### Bode graphs

Bode diagram in coordinates  $|Z| - \log f$  in the mid-frequency range is an inclined line indicating that the system has a predominant capacitive behavior. The maximum values of  $Z$  mod are manifested at higher concentrations of the corrosion inhibitor *tB-WPU* at the frequencies of 1-3 Hz. An increase in the value of  $Z$  mod in the presence of the corrosion inhibitor *tB-WPU* means the corrosion process deceleration.

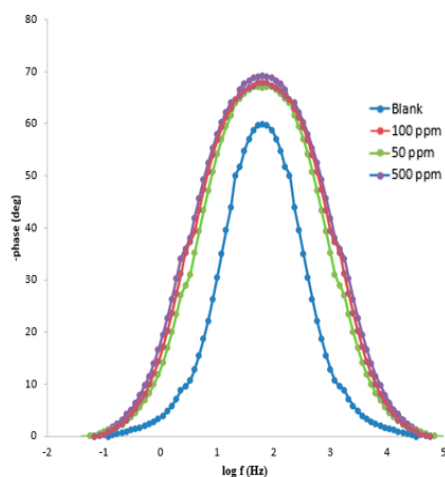

(a)

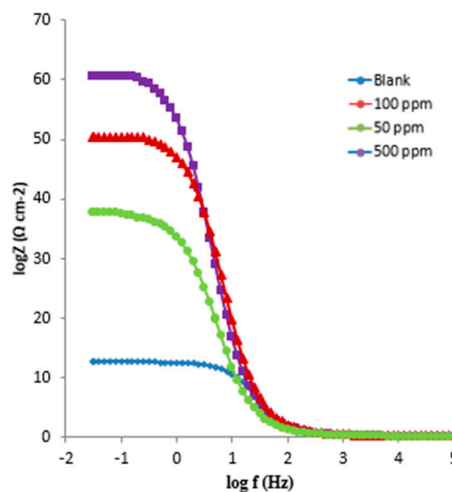

(b)

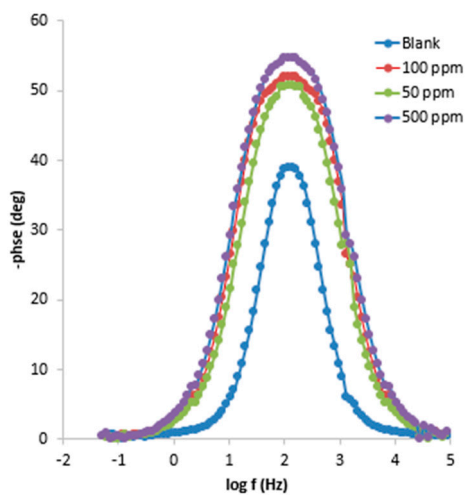

(c)

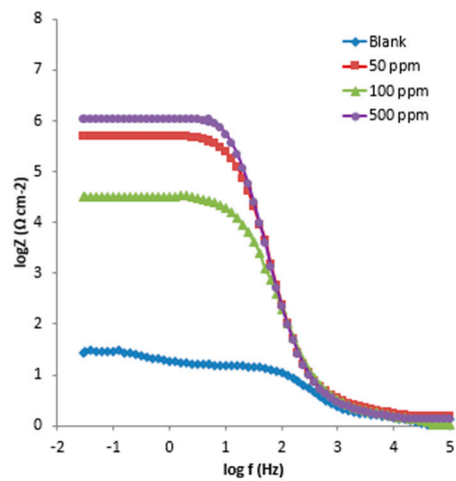

(d)

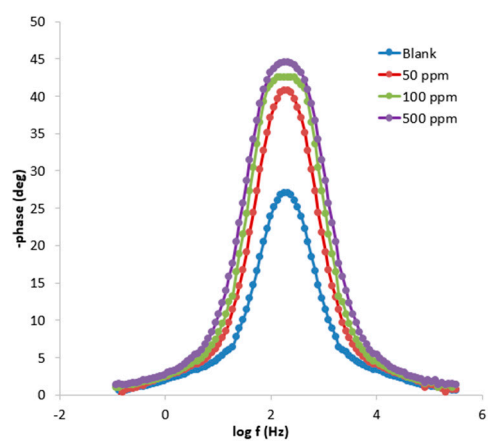

(e)

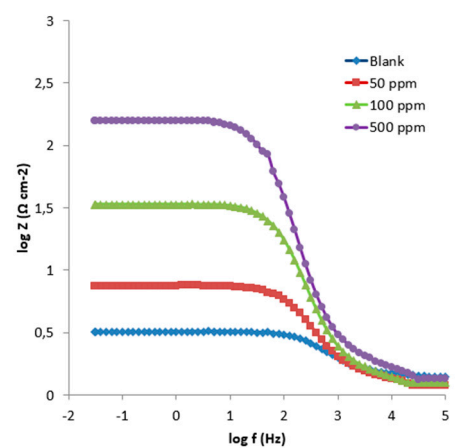

(f)

**Figure S1.** Bode phase angle plots (a,c,e) and Bode modulus plots (b,d,f) for CS in 2 M HCl in the absence and presence of different concentrations of *tB*-WPU inhibitor.
